# Supplementary material for: Measurement of Perceived Physician Empathy in Orthopedic Patients
Source: PubMed Central journal article supplement — J Patient Exp. 2019 Sep 12;7(4):600–6. doi: 10.1177/2374373519875842 (PMC7534139; doi:10.1177/2374373519875842), 2019-09-12
Supplement: Appendix_1.pdf [file Appendix_1.pdf]

Appendix 1: Bivariate analysis for both empathy questionnaires.

| <b>Table 5. Bivariate analysis for the Consultation and Relational Empathy (CARE) measure and all independent variables.</b> |  | <b>CARE<br/>(n=84)</b> | <b><i>p-value</i></b> |
|------------------------------------------------------------------------------------------------------------------------------|--|------------------------|-----------------------|
|                                                                                                                              |  | Pearson's R            |                       |
| Age                                                                                                                          |  | 0.24                   | <b>0.027</b>          |
| PHQ-2                                                                                                                        |  | - 0.20                 | <b>0.065</b>          |
| PSEQ-2                                                                                                                       |  | 0.24                   | <b>0.030</b>          |
|                                                                                                                              |  | Mean ± SD              |                       |
| Gender                                                                                                                       |  |                        | 0.89                  |
| Male                                                                                                                         |  | 46 ± 0.98              |                       |
| Female                                                                                                                       |  | 46 ± 0.97              |                       |
| Ethnicity                                                                                                                    |  |                        | 0.25                  |
| Non-white                                                                                                                    |  | 45 ± 1.4               |                       |
| White                                                                                                                        |  | 47 ± 0.77              |                       |
| Visit type                                                                                                                   |  |                        | 0.92                  |
| Follow-up                                                                                                                    |  | 46 ± 0.82              |                       |
| New                                                                                                                          |  | 46 ± 1.2               |                       |
| Highest educational degree                                                                                                   |  |                        | <b>0.085</b>          |
| High school/GED or some college                                                                                              |  | 46 ± 7.5               |                       |
| Bachelor's degree                                                                                                            |  | 49 ± 2.7               |                       |
| Master's degree, advanced graduate work or Ph.D.                                                                             |  | 45 ± 5.6               |                       |
| Employment status                                                                                                            |  |                        | 0.12                  |
| Currently employed                                                                                                           |  | 45 ± 7.2               |                       |
| Retired                                                                                                                      |  | 48 ± 3.6               |                       |
| Other                                                                                                                        |  | 47 ± 4.9               |                       |
| Marital status                                                                                                               |  |                        | <b>0.025</b>          |
| Single                                                                                                                       |  | 43 ± 8.5               |                       |

|                                                                                                 |          |      |
|-------------------------------------------------------------------------------------------------|----------|------|
| Married/remarried                                                                               | 48 ± 4.7 | 0.14 |
| Divorced/separated or widowed                                                                   | 46 ± 6.0 |      |
| Visit diagnosis                                                                                 |          |      |
| Trauma                                                                                          | 45 ± 7.5 |      |
| Non-trauma; pain                                                                                | 48 ± 4.4 |      |
| Non-trauma; other                                                                               | 46 ± 7.6 |      |
| PHQ = Patient Health Questionnaire; PSEQ = Pain Self-Efficacy Questionnaire                     |          |      |
| Discrete variables as number (percentage); continuous variables as mean (± standard deviation); |          |      |
| <b>Bold</b> indicates a p-value < 0.10.                                                         |          |      |

| <b>Table 6. Bivariate analysis for the Jefferson Scale of Patient's Perception of Physician Empathy (JSPPPE) and all independent variables.</b> |                         |                     |
|-------------------------------------------------------------------------------------------------------------------------------------------------|-------------------------|---------------------|
|                                                                                                                                                 | <b>JSPPE<br/>(n=84)</b> | <b>p-<br/>value</b> |
|                                                                                                                                                 | Pearson's R             |                     |
| Age                                                                                                                                             | 0.14                    | 0.22                |
| PHQ-2                                                                                                                                           | - 0.18                  | 0.11                |
| PSEQ-2                                                                                                                                          | 0.26                    | <b>0.019</b>        |
|                                                                                                                                                 | Mean ± SD               |                     |
| Gender                                                                                                                                          |                         | 0.75                |
| Male                                                                                                                                            | 29 ± 0.74               |                     |
| Female                                                                                                                                          | 28 ± 0.86               |                     |
| Ethnicity                                                                                                                                       |                         | 0.95                |
| Non-white                                                                                                                                       | 29 ± 1.1                |                     |
| White                                                                                                                                           | 29 ± 0.68               |                     |
| Visit type                                                                                                                                      |                         | <b>0.064</b>        |
| Follow-up                                                                                                                                       | 29 ± 0.67               |                     |
| New                                                                                                                                             | 27 ± 0.92               |                     |

|                                                                                                 |          |      |
|-------------------------------------------------------------------------------------------------|----------|------|
| Highest educational degree                                                                      |          | 0.25 |
| High school/GED or some college                                                                 | 28 ± 6.3 |      |
| Bachelor's degree                                                                               | 30 ± 4.0 |      |
| Master's degree, advanced graduate work or Ph.D.                                                | 28 ± 4.0 |      |
| Employment status                                                                               |          | 0.49 |
| Currently employed                                                                              | 28 ± 5.4 |      |
| Retired                                                                                         | 30 ± 4.7 |      |
| Other                                                                                           | 28 ± 5.5 |      |
| Marital status                                                                                  |          | 0.72 |
| Single                                                                                          | 29 ± 6.9 |      |
| Married/remarried                                                                               | 29 ± 4.3 |      |
| Divorced/separated or widowed                                                                   | 28 ± 5.6 |      |
| Visit diagnosis                                                                                 |          | 0.34 |
| Trauma                                                                                          | 28 ± 6.0 |      |
| Non-trauma; pain                                                                                | 29 ± 4.6 |      |
| Non-trauma; other                                                                               | 30 ± 3.8 |      |
| PHQ = Patient Health Questionnaire; PSEQ = Pain Self-Efficacy Questionnaire.                    |          |      |
| Discrete variables as number (percentage); continuous variables as mean (± standard deviation); |          |      |
| <b>Bold</b> indicates a p-value < 0.10.                                                         |          |      |

Appendix B: Bivariate analysis for patient satisfaction.

| Table 7. Bivariate analysis for patient satisfaction and all independent variables. | Satisfaction |                  |
|-------------------------------------------------------------------------------------|--------------|------------------|
|                                                                                     | (n=84)       | <i>p-value</i>   |
|                                                                                     | Pearson's R  |                  |
| CARE                                                                                | 0.76         | <b>&lt;0.001</b> |
| JSPPE                                                                               | 0.74         | <b>&lt;0.001</b> |
| Age                                                                                 | 0.21         | <b>0.061</b>     |

|                                                  |            |              |
|--------------------------------------------------|------------|--------------|
| PHQ-2                                            | - 0.20     | <b>0.075</b> |
| PSEQ-2                                           | 0.13       | 0.24         |
|                                                  | Mean ± SD  |              |
| Gender                                           |            | 0.21         |
| Male                                             | 9.2 ± 0.18 |              |
| Female                                           | 8.9 ± 0.20 |              |
| Ethnicity                                        |            | 0.76         |
| Non-white                                        | 9.0 ± 0.29 |              |
| White                                            | 9.1 ± 0.15 |              |
| Visit type                                       |            | <b>0.014</b> |
| Follow-up                                        | 9.2 ± 0.15 |              |
| New                                              | 8.4 ± 0.27 |              |
| Highest educational degree                       |            | 0.27         |
| High school/GED or some college                  | 9.0 ± 1.5  |              |
| Bachelor's degree                                | 9.4 ± 0.93 |              |
| Master's degree, advanced graduate work or Ph.D. | 8.8 ± 0.97 |              |
| Employment status                                |            | 0.31         |
| Currently employed                               | 8.9 ± 1.4  |              |
| Retired                                          | 9.2 ± 0.92 |              |
| Other                                            | 9.4 ± 0.81 |              |
| Marital status                                   |            | <b>0.064</b> |
| Single                                           | 8.6 ± 1.6  |              |
| Married/remarried                                | 9.3 ± 1.0  |              |
| Divorced/separated or widowed                    | 8.7 ± 1.2  |              |
| Visit diagnosis                                  |            | 0.66         |
| Trauma                                           | 8.9 ± 1.3  |              |
| Non-trauma; pain                                 | 9.1 ± 1.2  |              |
| Non-trauma; other                                | 9.0 ± 1.1  |              |

JSPPE = Jefferson Scale of Patient's Perception of Physician Empathy; CARE = Consultation And Relational Empathy; PHQ = Patient Health Questionnaire; PSEQ = Pain Self-Efficacy Questionnaire.

Discrete variables as number (percentage); continuous variables as mean ( $\pm$  standard deviation);

**Bold** indicates a p-value < 0.10.

Appendix C: Multivariable analysis to determine factors associated with one of both empathy questionnaires.

**Table 8. Multivariable analysis of factors associated with the standardized Consultation And Relational Empathy (CARE) Measure.**

| Variables                                        | $\beta$ regression coefficient<br>(95% confidence interval) | Standard error | P value | Partial R <sup>2</sup><br>(95% confidence interval) | Adjusted R <sup>2</sup> |
|--------------------------------------------------|-------------------------------------------------------------|----------------|---------|-----------------------------------------------------|-------------------------|
| Age                                              | 0.0061 (-0.0084 to 0.021)                                   | 0.0073         | 0.41    | 0.0093 (0 to 0.092)                                 | 0.13                    |
| PHQ-2                                            | -0.063 (-0.24 to 0.12)                                      | 0.091          | 0.49    | 0.0064 (0 to 0.083)                                 |                         |
| PSEQ-2                                           | 0.079 (-0.037 to 0.20)                                      | 0.059          | 0.18    | 0.024 (0 to 0.13)                                   |                         |
| Visit type                                       |                                                             |                |         |                                                     |                         |
| Follow-up                                        | <i>reference</i>                                            |                |         |                                                     |                         |
| New patient                                      | 0.10 (-0.41 to 0.61)                                        | 0.26           | 0.69    | 0.0022 (0 to 0.065)                                 |                         |
| Education                                        |                                                             |                |         |                                                     |                         |
| High school/GED or some college                  | <i>reference</i>                                            |                |         |                                                     |                         |
| Bachelor degree                                  | 0.16 (-0.40 to 0.72)                                        | 0.28           | 0.57    | 0.0042 (0 to 0.075)                                 |                         |
| Master's degree, advanced graduate work or Ph.D. | -0.43 (-0.98 to 0.12)                                       | 0.28           | 0.12    | 0.032 (0 to 0.14)                                   |                         |
| Marital status                                   |                                                             |                |         |                                                     |                         |
| Single                                           | <i>reference</i>                                            |                |         |                                                     |                         |
| Married/remarried                                | 0.58 (-0.0079 to 1.17)                                      | 0.29           | 0.053   | 0.049 (0 to 0.17)                                   |                         |
| Divorced/separated or widowed                    | 0.50 (-0.33 to 1.34)                                        | 0.42           | 0.232   | 0.019 (0 to 0.12)                                   |                         |

PHQ = Patient Health Questionnaire; PSEQ = Pain Self-Efficacy Questionnaire.

**Bold** indicates statistical significance,  $P < 0.05$ .

**Table 9. Multivariable analysis of factors associated with the standardized Jefferson Scale of Patient's Perception of Physician Empathy (JSPPE).**

| Variables | $\beta$ regression coefficient | Standard error | P value | Partial R <sup>2</sup> | Adjusted R <sup>2</sup> |
|-----------|--------------------------------|----------------|---------|------------------------|-------------------------|
|-----------|--------------------------------|----------------|---------|------------------------|-------------------------|

|                                                  | (95% confidence interval) |        |       | (95% confidence interval) |       |
|--------------------------------------------------|---------------------------|--------|-------|---------------------------|-------|
| Age                                              | 0.010 (-0.0050 to 0.025)  | 0.0076 | 0.19  | 0.023 (0 to 0.12)         | 0.062 |
| PHQ-2                                            | 0.16 (-0.17 to 0.20)      | 0.094  | 0.86  | 0.00039 (0 to 0.042)      |       |
| PSEQ-2                                           | 0.11 (-0.016 to 0.23)     | 0.061  | 0.087 | 0.039 (0 to 0.15)         |       |
| Visit type                                       |                           |        |       |                           |       |
| Follow-up                                        | <i>reference</i>          |        |       |                           |       |
| New patient                                      | - 0.49 (-1.01 to 0.040)   | 0.26   | 0.070 | 0.043 (0 to 0.16)         |       |
| Education                                        |                           |        |       |                           |       |
| High school/GED or some college                  | <i>reference</i>          |        |       |                           |       |
| Bachelor degree                                  | 0.14 (-0.44 to 0.72)      | 0.29   | 0.64  | 0.0030 (0 to 0.070)       |       |
| Master's degree, advanced graduate work or Ph.D. | - 0.20 (-0.76 to 0.37)    | 0.29   | 0.50  | 0.0062 (0 to 0.083)       |       |
| Marital status                                   |                           |        |       |                           |       |
| Single                                           | <i>reference</i>          |        |       |                           |       |
| Married/remarried                                | - 0.13 (-0.73 to 0.48)    | 0.31   | 0.68  | 0.0024 (0 to 0.066)       |       |
| Divorced/separated or widowed                    | - 0.12 (-0.98 to 0.75)    | 0.43   | 0.79  | 0.00096 (0 to 0.054)      |       |

PHQ = Patient Health Questionnaire; PSEQ = Pain Self-Efficacy Questionnaire.  
**Bold** indicates statistical significance,  $P < 0.05$ .

Appendix D: Multivariable analysis to determine factors associated with patient satisfaction.

| Table 10. Multivariable analysis of factors associated with patient satisfaction (model 1) |                                                             |                |                  |                                                     |                         |
|--------------------------------------------------------------------------------------------|-------------------------------------------------------------|----------------|------------------|-----------------------------------------------------|-------------------------|
| Retained variables                                                                         | $\beta$ regression coefficient<br>(95% confidence interval) | Standard error | <i>P</i> value   | Partial R <sup>2</sup><br>(95% confidence interval) | Adjusted R <sup>2</sup> |
| Standardized CARE                                                                          | 0.93 (0.76 to 1.1)                                          | 0.087          | <b>&lt;0.001</b> | 0.60 (0.46 to 0.69)                                 | 0.64                    |
| Age                                                                                        | 0.0041 (-0.0073 to 0.015)                                   | 0.0057         | 0.48             | 0.0066 (0 to 0.083)                                 |                         |

|                                                                                 |                        |       |                  |                      |
|---------------------------------------------------------------------------------|------------------------|-------|------------------|----------------------|
| PHQ-2                                                                           | 0.0056 (-0.10 to 0.11) | 0.054 | 0.92             | 0.00014 (0 to 0.029) |
| Visit type                                                                      |                        |       |                  |                      |
| Follow-up                                                                       | <i>reference</i>       |       |                  |                      |
| New patient                                                                     | - 0.79 (-1.2 to -0.39) | 0.19  | <b>&lt;0.001</b> | 0.17 (0.046 to 0.32) |
| Marital status                                                                  |                        |       |                  |                      |
| Single                                                                          | <i>reference</i>       |       |                  |                      |
| Married/remarried                                                               | -0.010 (-0.55 to 0.35) | 0.23  | 0.66             | 0.0025 (0 to 0.066)  |
| Divorced/separated or widowed                                                   | -0.38 (-1.0 to 0.23)   | 0.31  | 0.22             | 0.019 (0 to 0.11)    |
| CARE = Consultation And Relational Empathy; PHQ = Patient Health Questionnaire. |                        |       |                  |                      |
| <b>Bold</b> indicates statistical significance, $P < 0.05$ .                    |                        |       |                  |                      |

| <b>Table 11. Multivariable analysis of factors associated with patient satisfaction (model 2)</b>          |                                                                                |                       |                  |                                                            |                               |
|------------------------------------------------------------------------------------------------------------|--------------------------------------------------------------------------------|-----------------------|------------------|------------------------------------------------------------|-------------------------------|
| <b>Retained variables</b>                                                                                  | <b><math>\beta</math> regression coefficient<br/>(95% confidence interval)</b> | <b>Standard error</b> | <b>P value</b>   | <b>Partial R<sup>2</sup><br/>(95% confidence interval)</b> | <b>Adjusted R<sup>2</sup></b> |
| Standardized JSPPPE                                                                                        | 0.86 (0.67 to 1.0)                                                             | 0.091                 | <b>&lt;0.001</b> | 0.53 (0.38 to 0.64)                                        | 0.58                          |
| Age                                                                                                        | 0.0014 (-0.011 to 0.014)                                                       | 0.0062                | 0.83             | 0.00064 (0 to 0.048)                                       |                               |
| PHQ-2                                                                                                      | -0.032 (-0.15 to 0.082)                                                        | 0.057                 | 0.57             | 0.0041 (0 to 0.074)                                        |                               |
| Visit type                                                                                                 |                                                                                |                       |                  |                                                            |                               |
| Follow-up                                                                                                  | <i>reference</i>                                                               |                       |                  |                                                            |                               |
| New patient                                                                                                | -0.32 (-0.75 to 0.099)                                                         | 0.21                  | 0.13             | 0.029 (0 to 0.13)                                          |                               |
| Marital status                                                                                             |                                                                                |                       |                  |                                                            |                               |
| Single                                                                                                     | <i>reference</i>                                                               |                       |                  |                                                            |                               |
| Married/remarried                                                                                          | 0.54 (0.063 to 1.0)                                                            | 0.24                  | <b>0.027</b>     | 0.062 (0 to 0.19)                                          |                               |
| Divorced/separated or widowed                                                                              | 0.22 (-0.45 to 0.88)                                                           | 0.33                  | 0.514            | 0.0055 (0 to 0.079)                                        |                               |
| JSPPPE = Jefferson Scale of Patient's Perception of Physician Empathy; PHQ = Patient Health Questionnaire. |                                                                                |                       |                  |                                                            |                               |
| <b>Bold</b> indicates statistical significance, $P < 0.05$ .                                               |                                                                                |                       |                  |                                                            |                               |

Appendix E: Tertiary analysis to explain variance in patient satisfaction by specific factors.

| <b>Table 12. Tertiary analysis for CARE score per item.</b>      |                      |                                 |                                             |                |
|------------------------------------------------------------------|----------------------|---------------------------------|---------------------------------------------|----------------|
|                                                                  | <b>Single (n=22)</b> | <b>Married/remarried (n=50)</b> | <b>Divorced/separated or widowed (n=12)</b> | <b>p-value</b> |
| <b>How was the doctor at...</b>                                  | <b>Mean ± SD</b>     |                                 |                                             |                |
| Item 1: Making you feel at ease.                                 | 4.5 ± 0.86           | 4.8 ± 0.47                      | 4.8 ± 0.62                                  | 0.1            |
| Item 2: Letting you tell your "story".                           | 4.3 ± 1.0            | 4.8 ± 0.52                      | 4.6 ± 0.67                                  | 0.057          |
| Item 3: Really listening.                                        | 4.3 ± 1.1            | 4.8 ± 0.49                      | 4.6 ± 0.67                                  | <b>0.035</b>   |
| Item 4: Being interested in you as a whole person.               | 4.2 ± 1.1            | 4.6 ± 0.70                      | 4.6 ± 0.67                                  | 0.12           |
| Item 5: Fully understanding your concerns.                       | 4.3 ± 0.99           | 4.7 ± 0.56                      | 4.6 ± 0.67                                  | 0.075          |
| Item 6: Showing care and compassion.                             | 4.3 ± 1.0            | 4.7 ± 0.56                      | 4.6 ± 0.67                                  | <b>0.048</b>   |
| Item 7: Being positive.                                          | 4.5 ± 0.80           | 4.8 ± 0.46                      | 4.6 ± 0.67                                  | 0.16           |
| Item 8: Explaining things clearly.                               | 4.5 ± 0.86           | 4.9 ± 0.40                      | 4.5 ± 0.67                                  | <b>0.028</b>   |
| Item 9: Helping you to take control.                             | 4.4 ± 1.0            | 4.8 ± 0.48                      | 4.5 ± 0.67                                  | <b>0.026</b>   |
| Item 3: Making a plan of action with you.                        | 4.1 ± 1.1            | 4.8 ± 0.59                      | 4.8 ± 0.62                                  | <b>0.0056</b>  |
| CARE = Consultation And Relational Empathy.                      |                      |                                 |                                             |                |
| <b>Bold</b> indicates statistical significance, <i>P</i> < 0.05. |                      |                                 |                                             |                |



**Table 13. Tertiary analysis for JSPPE score per item.**

|                                                                         | Follow-up (n=65) | New patient (n=19) | <i>p-value</i> |
|-------------------------------------------------------------------------|------------------|--------------------|----------------|
|                                                                         | <b>Mean ± SD</b> |                    |                |
| Item 1: Can view things from my perspective (see things as I see them). | 6.2 ± 1.1        | 5.7 ± 1.0          | 0.14           |
| Item 2: Asks about what is happening in my daily life.                  | 5.5 ± 1.4        | 4.8 ± 0.92         | <b>0.042</b>   |
| Item 3: Seems concerned about me and my family.                         | 5.6 ± 1.3        | 5.1 ± 1.2          | 0.12           |
| Item 4: Understands my emotions, feelings and concerns.                 | 5.8 ± 1.1        | 5.2 ± 0.96         | <b>0.035</b>   |
| Item 5: Is an understanding doctor.                                     | 6.2 ± 1.0        | 5.9 ± 0.99         | 0.27           |

JSPPE = Jefferson Scale of Patient's Perception of Physician Empathy.

**Bold** indicates statistical significance,  $P < 0.05$ .
